# Supplementary material
Source: PubMed Central journal article supplement (PMC6599610)
Supplement: NIHMS1036639-supplement-Supplemental.pdf [file NIHMS1036639-supplement-Supplemental.pdf]

In the format provided by the authors and unedited.

# Genomic and transcriptomic profiling expands precision cancer medicine: the WINTHER trial

Jordi Rodon<sup>1,2,17</sup>, Jean-Charles Soria<sup>3,17</sup>, Raanan Berger<sup>4,17</sup>, Wilson H. Miller<sup>5,17</sup>, Eitan Rubin<sup>6</sup>, Aleksandra Kugel<sup>6</sup>, Apostolia Tsimberidou<sup>2</sup>, Pierre Saintigny<sup>7</sup>, Aliza Ackerstein<sup>4</sup>, Irene Braña<sup>1</sup>, Yohann Loriot<sup>3</sup>, Mohammad Afshar<sup>8</sup>, Vincent Miller<sup>9</sup>, Fanny Wunder<sup>10</sup>, Catherine Bresson<sup>10</sup>, Jean-François Martini<sup>11</sup>, Jacques Raynaud<sup>12</sup>, John Mendelsohn<sup>10,13,18</sup>, Gerald Batist<sup>5</sup>, Amir Onn<sup>4</sup>, Josep Taberero<sup>10</sup>, Richard L. Schilsky<sup>10,14</sup>, Vladimir Lazar<sup>10,17</sup>, J. Jack Lee<sup>15,17</sup> and Razelle Kurzrock<sup>10,16,17\*</sup>

<sup>1</sup>Vall d'Hebron Institute of Oncology (VHIO), Barcelona, Spain. <sup>2</sup>Department of Investigational Cancer Therapeutics, The University of Texas MD Anderson Cancer Center, Houston, TX, USA. <sup>3</sup>Gustave Roussy, Villejuif, France. <sup>4</sup>Chaim Sheba Medical Center, Tel Hashomer, Israel. <sup>5</sup>Segal Cancer Centre, Jewish General Hospital, QCROC-Quebec Cancer Consortium and Rossy Cancer Network, McGill University, Montreal, Québec, Canada. <sup>6</sup>Ben-Gurion University of the Negev, Beersheva, Israel. <sup>7</sup>Centre Léon-Bérard, Lyon, France. <sup>8</sup>Ariana Pharmaceuticals, Paris, France. <sup>9</sup>Foundation Medicine Inc., Cambridge, MA, USA. <sup>10</sup>Worldwide Innovative Network (WIN) Association-WIN Consortium, Villejuif, France. <sup>11</sup>Pfizer Inc., San Diego, CA, USA. <sup>12</sup>ARC Foundation for Cancer Research, Villejuif, France. <sup>13</sup>Sheikh Khalifa Bin Zayad Al Nahyan Institute for Personalized Cancer Therapy (IPCT), The University of Texas MD Anderson Cancer Center, Houston, TX, USA. <sup>14</sup>American Society of Clinical Oncology (ASCO), Alexandria, VA, USA. <sup>15</sup>Department of Biostatistics, The University of Texas MD Anderson Cancer Center, Houston, TX, USA. <sup>16</sup>University of California San Diego, Moores Cancer Center, San Diego, CA, USA. <sup>17</sup>These authors contributed equally: Jordi Rodon, Jean-Charles Soria, Raanan Berger, Wilson H. Miller, Vladimir Lazar, J. Jack Lee, Razelle Kurzrock. <sup>18</sup>Deceased: John Mendelsohn. \*e-mail: [rkurzrock@ucsd.edu](mailto:rkurzrock@ucsd.edu)

**Supplemental Table 1:** Patient medical and demographic information by arm (Arm A: DNA; Arm B: RNA)

| Variable                                               |               | Arm A (N=69)     | Arm B (N=38)     | Total (N=107)    |
|--------------------------------------------------------|---------------|------------------|------------------|------------------|
| Center code                                            | VHIO (Spain)  | 21 (30.4%)       | 23 (60.5%)       | 44 (41.1%)       |
|                                                        | CSM (Israel)  | 21 (30.4%)       | 4 (10.5%)        | 25 (23.4%)       |
|                                                        | IGR (France)  | 14 (20.3%)       | 9 (23.7%)        | 23 (21.5%)       |
|                                                        | SCC (Canada)  | 13 (18.8%)       | 2 (5.3%)         | 15 (14.0%)       |
| Sex                                                    | Men           | 36 (52.2%)       | 26 (68.4%)       | 62 (57.9%)       |
|                                                        | Women         | 33 (47.8%)       | 12 (31.6%)       | 45 (42.1%)       |
| Age dichotomized at age 60                             | <60 years     | 36 (52.2%)       | 21 (55.3%)       | 57 (53.3%)       |
|                                                        | ≥ 60 years    | 33 (47.8%)       | 17 (44.7%)       | 50 (46.7%)       |
| Cancer Diagnosis                                       | Colon         | 24 (34.8%)       | 10 (26.3%)       | 34 (31.8%)       |
|                                                        | Head and neck | 10 (14.5%)       | 11 (28.9%)       | 21 (19.6%)       |
|                                                        | Lung          | 17 (24.6%)       | 4 (10.5%)        | 21 (19.6%)       |
|                                                        | Other         | 18 (26.1%)       | 13 (34.2%)       | 31 (29.0%)       |
| ECOG performance status at treatment start date        | 0             | 21 (30.4%)       | 15 (39.4%)       | 36 (33.6%)       |
|                                                        | 1             | 48 (69.5%)       | 23 (60.5%)       | 71 (66.4%)       |
| Number of Prior Therapies                              | 1             | 6 (8.7%)         | 4 (10.5%)        | 10 (9.4%)        |
|                                                        | 2             | 17 (24.6%)       | 7 (18.4%)        | 24 (22.4%)       |
|                                                        | 3             | 20 (29.0%)       | 9 (23.7%)        | 29 (27.1%)       |
|                                                        | 4             | 10 (14.5%)       | 6 (15.8%)        | 16 (15.0%)       |
|                                                        | ≥5            | 16 (23.2%)       | 12 (31.6%)       | 28 (26.2%)       |
| Genomic Matching Score*                                | Low           | 19 (27.5%)       | 8 (21.1%)        | 27 (25.2%)       |
|                                                        | High          | 50 (72.5%)       | 30 (78.9%)       | 80 (74.8%)       |
| Median Age (Range)                                     |               | 59 (31-79)       | 59 (26-82)       | 59 (26-82)       |
| Median Number of prior therapies (IQR)                 |               | 3 (2-4)          | 3 (2-4)          | 3 (2-4)          |
| Median time from biopsy to treatment in months (IQR)** |               | 3.3 (2.4 to 5.2) | 3.1 (2.5 to 6.2) | 3.2 (2.4 to 5.5) |

**Abbreviations:** CSM = the Chaim Sheba Medical Center (Tel Hashomer, Israel); IGR = Gustave Roussy (Villejuif, France); IQR = interquartile range; N = number; SCC = Segal Cancer Centre, Jewish General, QCROC-Quebec Cancer Consortium and Rossy Cancer Network, McGill University (Montreal, Canada); SD = standard deviation; VHIO = Vall d'Hebron Institute of Oncology (Barcelona, Spain)

\*: Cut-off for genomic Matching Score for Arm A (based on DNA matching) is <0.25 (low), ≥0.25 (high); for Arm B (RNA matching) is <0.30 (low), ≥0.30 (high). The cutoff points were determined by using the recursive partitioning function rpart() in R.

\*\*To attenuate treatment delays, patients could be biopsied before failing current line of therapy (in anticipation of progression (they were not however started on WINTHER treatment until after imaging documentation of progression)); hence the time from biopsy to treatment might be lengthened in some cases without incurring a treatment delay.

**Supplemental Table 2: Matched normal tissue biopsy**

| <b>Tumor type</b>     | <b>Tumor target lesion</b> | <b>Normal matched tissue</b>                  | <b>Type of intervention for biopsy</b>                                      |
|-----------------------|----------------------------|-----------------------------------------------|-----------------------------------------------------------------------------|
| Lung                  | Metastasis                 | Bronchial mucosa                              | Interventional radiology for tumor tissue and fibroscopy for normal tissue  |
| Colon                 | Metastasis                 | Rectal/colon mucosa                           | Interventional radiology for tumor tissue and colonoscopy for normal tissue |
| Breast                | Metastasis                 | Normal breast tissue                          | Interventional radiology or echo                                            |
| Hepatocellular cancer | Metastasis                 | Normal liver tissue                           | Interventional radiology or echo                                            |
| Bladder               | Metastasis                 | Normal urothelium tissue                      | Endoscopy                                                                   |
| Rhabdomyosarcoma      | Metastasis                 | Skeletal muscle                               | Interventional radiology or echo                                            |
| Melanoma              | Metastasis                 | Nevi                                          | Dermatologic or by interventional radiology                                 |
| Liposarcoma           | Metastasis                 | Adipose tissue                                | Interventional radiology                                                    |
| Lymphoma              | Metastasis                 | Lymph nodes                                   | Interventional radiology                                                    |
| Head and Neck         | Metastasis                 | Tongue, normal tissue depending on tumor type | Surgery and interventional radiology                                        |

**Supplemental Table 3: Characteristics of WINTHER Treatments\***

| <b>Characteristics of Drugs Administered</b>                                                    | <b>Arm A</b> | <b>Arm B</b> | <b>Both Arms</b> |
|-------------------------------------------------------------------------------------------------|--------------|--------------|------------------|
| Total number of different drugs                                                                 | 46           | 31           | 77               |
| Number of patients who received single agent treatment                                          | 36           | 27           | 63               |
| Number of patients who received $\geq 2$ drugs                                                  | 33           | 11           | 44               |
| Number of immunotherapy (checkpoint inhibitors) agents given                                    | 2            | 6            | 8                |
| Number of gene-targeted agents given                                                            | 90           | 35           | 125              |
| Number of cytotoxic chemotherapies given                                                        | 15           | 6            | 21               |
| Number of hormonal modulator agents                                                             | 1            | 4            | 5                |
| <b>On-label, off-label approved drugs and investigational drugs used**</b>                      |              |              |                  |
| Number of investigational drugs                                                                 | 16           | 6            | 22               |
| Number of approved off-label drugs                                                              | 77           | 38           | 115              |
| Number of approved on-label drugs                                                               | 15           | 7            | 22               |
| <b>Drug targets (number of patients who received a drug that impacted designated target)***</b> | <b>Arm A</b> | <b>Arm B</b> | <b>Both Arms</b> |
| BRAF                                                                                            | 2            | 0            | 2                |
| CDK4/6                                                                                          | 3            | 0            | 3                |
| HER pathway (EGFR/ERBB2/ERBB3/ERBB4)                                                            | 11           | 6            | 17               |
| FGFR                                                                                            | 6            | 3            | 9                |
| MEK                                                                                             | 17           | 0            | 17               |
| MET                                                                                             | 1            | 10           | 11               |
| PARP                                                                                            | 1            | 0            | 1                |
| Pan RAF                                                                                         | 1            | 0            | 1                |
| PI3K/AKT/mTOR                                                                                   | 20           | 3            | 23               |
| RET                                                                                             | 3            | 1            | 4                |
| VEGFR                                                                                           | 14           | 18           | 32               |
| WNT                                                                                             | 5            | 0            | 5                |
| HORMONAL RECEPTOR                                                                               | 0            | 2            | 2                |
| IMMUNE                                                                                          | 2            | 5            | 7                |
| OTHER                                                                                           | 11           | 11           | 22               |

\*Overall, 22/159 drugs (13.8% of drugs) given were on label. Our analysis shows that 28 (26.2%) of 107 patients achieved stable disease of at least six months/PR/CR. Of these 28 patients, five received a therapy regimen that included an on-label drug.

\*\*Whether a drug was approved on-label or off-label or was investigational was determined according to the indication approval status in the country in which the patient was treated. A drug may be approved in an indication but only if given with another specific drug or for a specific mutation: if the patient received that drug not in combination with the other drug for which it was approved, or if the patient did not have the mutation specified, then that drug was considered off-label. Finally, a drug may be approved in an indication but only in a particular sub-type histology. For example all lung patients recruited in the study were of non-small cell lung cancer histology. In France, authorization of carboplatin is only for small cell lung cancer.

Sulindac (targeting APC mutation) was always counted OFF-label.

\*\*\*Some drugs have more than one target

**Supplemental Table 4. Detailed clinical and biological information for each patient**

| Study ID | Age | Sex | Cancer site                         | Date of WINTHER treatment start | Number of prior treatments | ECOG performance status at WINTHER treatment start | Arm   | Response | Time PFS1 | Event PFS1 | Time PFS2 | Event PFS2 | PFS Ratio | Date Progression under WINTHER treatment | Date Death | Date Last Known Alive | Time OS | Event OS | Drug given***                                                         | DNA - List of molecular alterations (F1 report)*                                                                                                                                                                         | RNA - Relevant overexpressed genes** (Overexpression presented as fold changes in Tumor vs Normal matched tissues)                                                                                                                                                                                                                                                                                                                                                                                                                                                                                                                                          | DNA, matching score, high | RNA, matching score, high | Raw matching score (see Supplemental References and online Methods)*** |
|----------|-----|-----|-------------------------------------|---------------------------------|----------------------------|----------------------------------------------------|-------|----------|-----------|------------|-----------|------------|-----------|------------------------------------------|------------|-----------------------|---------|----------|-----------------------------------------------------------------------|--------------------------------------------------------------------------------------------------------------------------------------------------------------------------------------------------------------------------|-------------------------------------------------------------------------------------------------------------------------------------------------------------------------------------------------------------------------------------------------------------------------------------------------------------------------------------------------------------------------------------------------------------------------------------------------------------------------------------------------------------------------------------------------------------------------------------------------------------------------------------------------------------|---------------------------|---------------------------|------------------------------------------------------------------------|
| 1        | 52  | F   | Breast                              | 01/07/2013                      | 2                          | 0                                                  | Arm A | 4        | 57.2      | 1          | 1.7       | 1          | 0.1       | 23/08/2013                               |            | 04/04/2017            | 45.7    | 0        | PHASE 1 NCT01283945 LUCITANIB (E-3810) (FGFR and VEGFR inhibitor)     | FGFR1 amplification<br>MYC amplification<br>FGF3 amplification<br>TP53 R173L mutation<br>CCND1 amplification<br>ZNF703 amplification<br>FGF4 amplification<br>FGF9 amplification<br>GATA-3 splice                        |                                                                                                                                                                                                                                                                                                                                                                                                                                                                                                                                                                                                                                                             | 1                         |                           | 0.56                                                                   |
| 2        | 59  | M   | Head and Neck                       | 13/08/2013                      | 2                          | 2                                                  | Arm A | 4        | 2.8       | 1          | 1.4       | 1          | 0.5       | 27/09/2013                               | 27/09/2013 |                       | 1.5     | 1        | PACITAXEL + TRASTUZUMAB (ERBB2 targeting)                             | EGFR Amplification<br>ERBB2 amplification<br>CCND1 amplification<br>CDKN2A/B loss<br>FGF3 amplification<br>TP53 G3256*14<br>DNMT3A R82C<br>LRP1B truncation, loss of LRP1Bb6<br>FGF9 amplification<br>FGF4 amplification |                                                                                                                                                                                                                                                                                                                                                                                                                                                                                                                                                                                                                                                             | 0                         |                           | 0.1                                                                    |
| 4        | 59  | M   | Head and Neck                       | 08/08/2013                      | 3                          | 1                                                  | Arm B | 4        | 3.1       | 1          | 0.2       | 1          | 0.1       | 15/08/2013                               | 15/08/2013 |                       | 0.2     | 1        | PHASE 1 NCT01391533 SARI25844 (MET inhibitor)                         | MDM2 amplification<br>CDKN2A/B loss<br>SOX2 amplification<br>TP53 L2066*4, exon 5 splice acceptor site deletion                                                                                                          | MET (7.3 fold change) overexpression; ranked 1st in single interaction                                                                                                                                                                                                                                                                                                                                                                                                                                                                                                                                                                                      |                           | 1                         | 1                                                                      |
| 5        | 52  | M   | Lung                                | 18/07/2013                      | 4                          | 1                                                  | Arm A | 2        | 22.8      | 1          | 10.4      | 1          | 0.4       | 27/05/2014                               | 04/10/2016 |                       | 39.1    | 1        | PHASE 1 NCT01391533 SARI25844 (MET inhibitor)                         | EGFR amplification, truncation exon 20<br>MET amplification<br>STK11 D2776*10<br>TP53 V976*26                                                                                                                            |                                                                                                                                                                                                                                                                                                                                                                                                                                                                                                                                                                                                                                                             | 1                         |                           | 0.25                                                                   |
| 6        | 64  | F   | Other: Carcinoma of Unknown Primary | 01/07/2013                      | 1                          | 0                                                  | Arm A | 3        | 6.7       | 1          | 8.1       | 1          | 1.2       | 04/03/2014                               | 12/03/2014 |                       | 8.4     | 1        | EVEROLIMUS (mTOR inhibitor)                                           | TSC1 splice site 913+1G>T<br>BRCA1 truncation, intron 11<br>CDKN2A/B loss<br>DNMT3A R82H<br>LRP1B loss                                                                                                                   |                                                                                                                                                                                                                                                                                                                                                                                                                                                                                                                                                                                                                                                             | 0                         |                           | 0                                                                      |
| 7        | 71  | M   | Lung                                | 04/09/2013                      | 6                          | 1                                                  | Arm B | 4        | 27.1      | 1          | 4.8       | 1          | 0.2       | 28/01/2014                               | 01/09/2015 |                       | 24.2    | 1        | CAPECITABINE + TRASTUZUMAB (HER2 inhibitor)                           | KRAS G12D<br>CDKN2A/B loss                                                                                                                                                                                               | ERBB3 (7.4 fold change) overexpression and ERBB2 (1.8 fold change) overexpression; ranked 1st in single interaction; combined with a chemotherapy to potentiate the effect of the therapy.<br><br>Overexpression score for capecitabine (see Comparative Toxicogenomics Database <a href="http://cddb.eugene.igb.uci.edu/">http://cddb.eugene.igb.uci.edu/</a> ):<br>ACPA7 (2.5 fold change), AGR2 (4.0 fold change), ERBB1 (7.4 fold change), EL788 (5.1 fold change), EGALS4 (5.0 fold change), PDCS1 (2.9 fold change), S100P (3.1 fold change), TET1 (5.6 fold change) and TRIM15 (5.7 fold change) overexpression; ranked 2nd in multiple interaction. |                           | 1                         | 1                                                                      |
| 10       | 40  | F   | Lung                                | 18/06/2013                      | 2                          | 1                                                  | Arm A | 4        | 3.2       | 1          | 3.9       | 1          | 1.2       | 16/10/2013                               | 29/10/2013 |                       | 4.4     | 1        | SORAFENIB (VEGFR and RET inhibitor)                                   | RET KIF5B-RET fusion<br>CDKN2A/B loss<br>MYC amplification<br>TP53 I251N, S241Y                                                                                                                                          |                                                                                                                                                                                                                                                                                                                                                                                                                                                                                                                                                                                                                                                             | 1                         |                           | 0.5                                                                    |
| 23       | 57  | M   | Lung                                | 05/09/2013                      | 1                          | 0                                                  | Arm A | 4        | 7.0       | 1          | 5.5       | 1          | 0.8       | 19/02/2014                               |            | 30/06/2017            | 46.4    | 0        | PHASE 2 NCT01524978 Basket VEMURAFENIB (BRAF inhibitor)               | BRAF V600E<br>PKC3A E548K<br>SETD2 E348*, K2525f*1                                                                                                                                                                       |                                                                                                                                                                                                                                                                                                                                                                                                                                                                                                                                                                                                                                                             | 1                         |                           | 0.33                                                                   |
| 25       | 65  | M   | Head and Neck                       | 15/10/2013                      | 2                          | 1                                                  | Arm B | 2        | 5.1       | 1          | 5.3       | 1          | 1.2       | 26/03/2014                               | 26/03/2014 |                       | 5.4     | 1        | AXITINIB (PDGFR and VEGFR targeting)                                  | TP53 I195F<br>KDM6A L1256*4<br>MSH6 R1586*2<br>NF2E1.2 R180 subclonal                                                                                                                                                    | PDGFRA (4.5 fold change)/PDGFRB (27.0 fold change), KDR (VEGFR2) (8.9 fold change)/FLT1 (VEGFR1) (9.1 fold change) overexpression; ranked 4th in the multiple interaction; score:                                                                                                                                                                                                                                                                                                                                                                                                                                                                           |                           | 0                         | 0.25                                                                   |
| 30       | 66  | F   | Other: GI tract / Rectum            | 03/10/2013                      | 7                          | 0                                                  | Arm A | 4        | 8.2       | 1          | 3.6       | 1          | 0.4       | 22/01/2014                               | 20/04/2014 |                       | 6.63    | 1        | PHASE 1b NCT01449058 BYL719 + CMEK162 (PI3K + MEK inhibitors)         | KRAS G12V<br>PKC3A D350G<br>TP53 R75H<br>BRCA1 K532*<br>APC E1286*, K534*<br>ATRX L192F                                                                                                                                  |                                                                                                                                                                                                                                                                                                                                                                                                                                                                                                                                                                                                                                                             | 1                         |                           | 0.33                                                                   |
| 42       | 65  | M   | Other: Kidney                       | 16/10/2013                      | 3                          | 0                                                  | Arm B | 2        | 11.5      | 1          | 2.5       | 1          | 0.2       | 01/01/2014                               | 23/01/2014 |                       | 3.3     | 1        | CETUXIMAB + ERLOTINIB                                                 | VHL E55*<br>PTEN splice site 164+1G>C<br>SETD2 I11206*34                                                                                                                                                                 | EGFR (3.8 fold change) overexpression; ranked 1st in single interaction;                                                                                                                                                                                                                                                                                                                                                                                                                                                                                                                                                                                    |                           | 1                         | 1                                                                      |
| 59       | 54  | M   | Other: GI Tract / Gastric           | 28/01/2014                      | 5                          | 0                                                  | Arm B | 4        | 1.6       | 1          | 1.2       | 1          | 0.7       | 07/03/2014                               | 20/07/2014 |                       | 5.7     | 1        | PHASE 1 CL1-49076-001 S49076 (MET inhibitor)                          | CTNNB1 D32V                                                                                                                                                                                                              | MET (2.2 fold change) overexpression; ranked 1st in single interaction<br>HGF (MET Ligand) (6.3 fold change) overexpression; ranked 1st in multiple interaction                                                                                                                                                                                                                                                                                                                                                                                                                                                                                             |                           | 1                         | 1                                                                      |
| 69       | 32  | F   | Breast                              | 31/01/2014                      | 6                          | 1                                                  | Arm A | 4        | 1.8       | 1          | 0.8       | 1          | 0.4       |                                          | 25/02/2014 |                       | 0.8     | 1        | EVEROLIMUS                                                            | NF1 D724b*2<br>PTEN G230*<br>TP53 R206*<br>MYC amplification<br>BARD1 splice site 1569-2A>G                                                                                                                              |                                                                                                                                                                                                                                                                                                                                                                                                                                                                                                                                                                                                                                                             | 0                         |                           | 0                                                                      |
| 72       | 63  | M   | Colon                               | 04/03/2015                      | 5                          | 1                                                  | Arm B | 4        | 3.9       | 1          | 4.6       | 1          | 1.1       | 22/07/2015                               | 12/11/2015 |                       | 8.4     | 1        | CABOZANTINIB (AXL/VEGFR/MET inhibitor)                                | KRAS G13D<br>TP53 A766*55<br>APC R1450*<br>FAM123B E627*<br>MYST3 amplification - equivocal                                                                                                                              | AXL (3.5 fold change) overexpression, KDR/VEGFR2 (1.9 fold change) MET (2.9 fold change), HGF/MET Ligand (3.9 fold change) overexpression; ranked 2nd in multiple interaction                                                                                                                                                                                                                                                                                                                                                                                                                                                                               |                           | 1                         | 0.5                                                                    |
| 81       | 66  | F   | Other: GI Tract / Gastric           | 04/09/2015                      | 6                          | 0                                                  | Arm A | 4        | 7.4       | 1          | 4.2       | 1          | 0.5       |                                          | 09/01/2016 |                       | 4.2     | 1        | CAPECITABINE + EVEROLIMUS                                             | PKC3A E542K<br>ARID1A G2975*65<br>SMAAD4 Q455*<br>KDM5C G14676*5                                                                                                                                                         |                                                                                                                                                                                                                                                                                                                                                                                                                                                                                                                                                                                                                                                             | 1                         |                           | 0.25                                                                   |
| 83       | 59  | M   | Head and Neck                       | 04/06/2014                      | 4                          |                                                    | Arm B | 3        | 5.4       | 1          | 8.8       | 1          | 1.6       | 27/02/2015                               | 09/05/2016 |                       | 23.5    | 1        | AXITINIB (PDGFR and VEGFR inhibitor)                                  | MTOR L2309V subclonal<br>ETV6 truncation intron 5<br>CIC S3336*36<br>MLL2 G3698 6*51                                                                                                                                     | VEGFA (3.3 fold change)<br>FLT1/VEGFR1 (3.8 fold change), PDGFRB (3.0 fold change) and PDGFRA (3.4 fold change); ranked 3rd in multiple interaction                                                                                                                                                                                                                                                                                                                                                                                                                                                                                                         |                           | 1                         | 0.33                                                                   |
| 84       | 35  | F   | Breast                              | 29/01/2015                      | 5                          | 1                                                  | Arm A | 4        | 8.9       | 1          | 1.2       | 1          | 0.1       | 06/03/2015                               | 26/06/2015 |                       | 4.9     | 1        | PHASE 1 NCT01703481 JNJ-42756493 (Pan-FGFR Tyrosine Kinase Inhibitor) | FGFR1 amplification<br>CDKN2B 156-23del1<br>MYC amplification-equivocal<br>TP53 S3036*47<br>MSH2 truncation exon 5<br>ZNF703 amplification                                                                               |                                                                                                                                                                                                                                                                                                                                                                                                                                                                                                                                                                                                                                                             | 0                         |                           | 0.16                                                                   |
| 85       | 57  | M   | Lung                                | 07/05/2014                      | 3                          | 1                                                  | Arm B | 4        | 1.9       | 1          | 1.5       | 1          | 0.8       | 22/06/2014                               | 22/06/2014 |                       | 1.5     | 1        | CAPECITABINE + BEVACIZUMAB (VEGF antibody)                            | KRAS G12C<br>STK11 splice site 375-2A>G<br>TP53 V1571, splice site 375-1G>T<br>PAX5 E263*<br>SMAAD2 R120*<br>SMAAD3 splice site 1309-1G>T<br>CIC R202W<br>LRP1B G2125C                                                   | VEGFA (3.1 fold change) overexpression; ranked 1st in the single interaction;<br>combined with a chemotherapy ranked 11th in multiple interaction.<br><br>Downregulated gene for capecitabine; see Comparative Toxicogenomics Database <a href="http://cddb.eugene.igb.uci.edu/">http://cddb.eugene.igb.uci.edu/</a> :<br>CDKN2A (1.9 fold change), CDKN2A A (1.6 fold change), EL788 (0.1 fold change), EGALS4 (2.4 fold change), TET1 (3.1 fold change), TRIM15 (8.5 fold change)                                                                                                                                                                         |                           | 1                         | 1                                                                      |
| 87       | 54  | M   | Bladder                             | 07/08/2014                      | 2                          | 0                                                  | Arm A | 4        | 8.6       | 1          | 1.9       | 1          | 0.2       | 05/10/2014                               | 30/12/2015 |                       | 17.0    | 1        | VELIPARIB (PARP inhibitor) + CARBOPLATIN + PACITAXEL                  | ATR pcoo2-otr fusion<br>BRCA1 E236*17<br>CDKN2A/B loss                                                                                                                                                                   |                                                                                                                                                                                                                                                                                                                                                                                                                                                                                                                                                                                                                                                             | 1                         |                           | 1                                                                      |
| 88       | 56  | M   | Lung                                | 04/02/2015                      | 1                          | 0                                                  | Arm B | 4        | 13.2      | 1          | 2.9       | 1          | 0.2       | 06/05/2015                               |            | 30/06/2017            | 29.2    | 0        | AXITINIB (PDGFR and VEGFR inhibitor)                                  | DNMT3A R635P<br>KRAS G12C<br>TP53 Y202C<br>MLL2 T1246M                                                                                                                                                                   | FLT1/VEGFR1 (6.3 fold change)<br>VEGFA (7.4 fold change), PDGFRA (5.7 fold change), PDGFRB (11.1 fold change) overexpression, each ranked 1st in multiple interaction                                                                                                                                                                                                                                                                                                                                                                                                                                                                                       |                           | 1                         | 1                                                                      |
| 90       | 74  | M   | Head and Neck                       | 10/12/2014                      | 2                          | 1                                                  | Arm A | 4        | 5.3       | 1          | 1.3       | 1          | 0.2       | 18/01/2015                               | 13/05/2015 |                       | 5.1     | 1        | EVEROLIMUS                                                            | PKC3A Q548R<br>EP300 D1546*30<br>NOTCH1 L17466*40                                                                                                                                                                        |                                                                                                                                                                                                                                                                                                                                                                                                                                                                                                                                                                                                                                                             | 0                         |                           | 0                                                                      |
| 91       | 46  | F   | Rhabdomyosarcoma                    | 30/06/2014                      | 4                          | 1                                                  | Arm B | 4        | 1.3       | 1          | 1.8       | 1          | 1.4       | 25/08/2014                               | 17/02/2016 |                       | 19.9    | 1        | PAZOPANIB (FGFR inhibitor)                                            | CDK4 amplification                                                                                                                                                                                                       | FGFR1 (6.1 fold change), FGFR2 (6.6 fold change), FGFR3 (34.4 fold change), FGFR4 (6.7 fold change) overexpression; ranked 1st in the multiple interaction                                                                                                                                                                                                                                                                                                                                                                                                                                                                                                  |                           | 1                         | 1                                                                      |



|     |    |   |                                                        |            |   |   |       |   |      |   |      |   |      |            |            |            |      |                                                                                 |                                                                                                                                                                                                                                                                                                                                                                                                                                                                                                                                                                                                   |                                                                                                                                                                  |  |   |      |      |
|-----|----|---|--------------------------------------------------------|------------|---|---|-------|---|------|---|------|---|------|------------|------------|------------|------|---------------------------------------------------------------------------------|---------------------------------------------------------------------------------------------------------------------------------------------------------------------------------------------------------------------------------------------------------------------------------------------------------------------------------------------------------------------------------------------------------------------------------------------------------------------------------------------------------------------------------------------------------------------------------------------------|------------------------------------------------------------------------------------------------------------------------------------------------------------------|--|---|------|------|
| 183 | 66 | M | Colon                                                  | 04/03/2015 | 2 | 0 | Arm A | 2 | 9.4  | 1 | 25.5 | 0 | 2.7  |            | 19/04/2017 | 25.9       | 0    | PEMBROLIZUMAB (anti PD-1)                                                       | ERBB3 V104M<br>MAP2K1 E205K<br>CDKN2A/B loss<br>FBXW7 R465C<br>PIK3CA E39K<br>PIK3R1 R348* R639*<br>PTEN R233*, splice site<br>801-2T-G<br>TP53 R138H, R273H<br>APC R1450*, R499*<br>ARID1A P11156*46,<br>Q13066*17<br>ATRX Q2422*<br>CDH1 D433N<br>EP300 R2263*<br>FAM123B R631*<br>FAT1 A4305V<br>FLCN H4296*39<br>MSH6 L13306*12, S2796*12                                                                                                                                                                                                                                                     |                                                                                                                                                                  |  | 1 | 1    |      |
| 190 | 50 | F | Lung                                                   | 30/08/2015 | 3 | 0 | Arm A | 2 | 5.9  | 1 | 21.6 | 0 | 3.6  |            | 18/06/2017 | 21.93      | 0    | OSIMERTINIB (EGFR inhibitor)                                                    | EGFR E746_A750del<br>EGFR T790M<br>AKT1 amplification-equival<br>PDGFRA duplication exons 12-23<br>TP53 splice site 97-2A-C<br>NKX2-1 amplification-equival                                                                                                                                                                                                                                                                                                                                                                                                                                       |                                                                                                                                                                  |  | 1 | 0.33 |      |
| 191 | 50 | F | Other: Pleura                                          | 04/06/2015 | 4 | 1 | Arm A | 4 | 4.1  | 1 | 1.1  | 1 | 0.2  | 06/07/2015 | 13/07/2015 | 1.3        | 1    | EVEROLIMUS (PI3K/Akt/mTOR inhibitor) + BEVACIZUMAB (VEGF antibody)              | NF2 M409617<br>CDKN2A/B loss<br>TP53 H214R                                                                                                                                                                                                                                                                                                                                                                                                                                                                                                                                                        |                                                                                                                                                                  |  | 1 | 0.66 |      |
| 192 | 55 | F | Colon                                                  | 20/05/2015 | 4 | 1 | Arm A | 4 | 2.   | 1 | 1.2  | 1 | 0.5  | 26/06/2015 | 04/08/2015 | 2.5        | 1    | TRAMETINIB (MEK inhibitor) + CARBOPLATIN (targets FANCA)                        | KRAS G12D<br>CTNNB1 S45*<br>FANCA G9726*17<br>TP53 C176Y-subclonal, R273H<br>MLL2 L39486*88<br>SOX9 R394*, T4605*11                                                                                                                                                                                                                                                                                                                                                                                                                                                                               |                                                                                                                                                                  |  | 1 | 0.33 |      |
| 194 | 48 | F | Head and Neck                                          | 22/05/2015 | 5 | 0 | Arm B | 4 | 1.8  | 1 | 1.2  | 1 | 0.6  | 29/06/2015 | 04/08/2015 | 2.4        | 1    | IPILIMUMAB                                                                      | CDKN2A/B loss                                                                                                                                                                                                                                                                                                                                                                                                                                                                                                                                                                                     | CTLA4 (6.8 fold change) overexpression, ranked 4th in the single interaction                                                                                     |  | 0 | 0.25 |      |
| 195 | 57 | M | Head and Neck                                          | 30/04/2015 | 3 | 1 | Arm B | 4 | 0.8  | 1 | 1.2  | 1 | 1.5  | 05/06/2015 | 28/11/2015 | 7.1        | 1    | IPILIMUMAB                                                                      | CDKN2A/B loss                                                                                                                                                                                                                                                                                                                                                                                                                                                                                                                                                                                     | CTLA4 (8.8 fold change) overexpression, ranked 2nd in the single interaction                                                                                     |  | 1 | 0.5  |      |
| 200 | 76 | F | Colon                                                  | 28/05/2015 | 4 | 1 | Arm A | 4 | 2.5  | 1 | 2.0  | 1 | 0.8  | 28/07/2015 | 25/12/2015 | 7.0        | 1    | AXITINIB (KOR (VEGFR2) and other VEGFR inhibitor) + TRAMETINIB (MEK inhibitor)  | KOR K142R<br>KRAS G12D<br>TP53 S127P<br>APC V14526*22                                                                                                                                                                                                                                                                                                                                                                                                                                                                                                                                             |                                                                                                                                                                  |  | 1 | 0.75 |      |
| 201 | 26 | M | Other: GI Tract / Rectum                               | 21/04/2015 | 3 | 0 | Arm B | 4 | 9.5  | 1 | 1.1  | 1 | 0.1  | 26/05/2015 | 28/09/2015 | 5.3        | 1    | PHASE 1 NCT02912949 MCLA128 (ERBB2 and ERBB3 inhibitor)                         | KRAS G12V<br>MYC amplification<br>TP53 C230Y<br>APC V8305*12                                                                                                                                                                                                                                                                                                                                                                                                                                                                                                                                      | AREG (8.1 fold change) and EREG (22.6 fold change) overexpression ranked 3rd in multiple interaction                                                             |  | 0 | 0.17 |      |
| 203 | 67 | F | Other: GI Tract / Small Intestine neuroendocrine tumor | 06/05/2015 | 1 | 1 | Arm B | 3 | 8.1  | 1 | 24.3 | 0 | 2.9  |            | 15/05/2017 | 24.6       | 0    | EVEROLIMUS (PI3K/Akt/mTOR inhibitor)                                            | No mutation                                                                                                                                                                                                                                                                                                                                                                                                                                                                                                                                                                                       | AKT1 (7.3 fold change)/AKT2 (11.2 fold change) overexpression, PIK3CA (1.8 fold change); Drugs targeting the mTOR pathway ranked 2nd in the multiple interaction |  | 1 | 0.5  |      |
| 204 | 68 | M | Colon                                                  | 25/05/2015 | 4 | 1 | Arm B | 4 | 2.0  | 1 | 1.7  | 1 | 0.8  | 16/07/2015 | 13/09/2015 | 3.7        | 1    | CABOZANTINIB (VEGFR/MET inhibitor)                                              | KRAS Q61H<br>PIK3CA Q546R<br>TP53 G245S<br>APC G430*<br>SPTA1 R2016I                                                                                                                                                                                                                                                                                                                                                                                                                                                                                                                              | VEGFA (5.0 fold change) and MET (4.3 fold change) overexpression, ranked 1st and 2nd in the single interaction                                                   |  | 1 | 1    |      |
| 205 | 69 | M | Other: GI Tract / Rectum                               | 20/05/2015 | 3 | 1 | Arm A | 4 | 1    | 1 | 1.2  | 1 | 0.7  | 25/06/2015 | 24/08/2015 | 3.2        | 1    | PHASE 18 NCT02510001 MERCURIC PF-02341066 + PD-0329001 (MET and MEK inhibitors) | KRAS G12V<br>FANCA rearrangement intron 12<br>TP53 S183*<br>APC P12416*12<br>RUNX1T1 R149H<br>SMAD4 D537E                                                                                                                                                                                                                                                                                                                                                                                                                                                                                         | VEGFA (5.5 fold change) overexpression, ranked 4th in the single interaction                                                                                     |  | 1 | 0.33 |      |
| 210 | 72 | M | Colon                                                  | 01/04/2015 | 2 | 1 | Arm A | 4 | 3.7  | 1 | 1.6  | 1 | 0.4  | 19/05/2015 | 05/08/2015 | 4.2        | 1    | PHASE 1 NCT01750918 MEK116833; TRAMETINIB + PANITUMAB (EGFR inhibitor)          | BRAF V600E<br>PTEN Q171E<br>TP53 Q165*<br>APC C2846*4, R499*, T1556*3<br>SMAD4 Q410*                                                                                                                                                                                                                                                                                                                                                                                                                                                                                                              |                                                                                                                                                                  |  | 1 | 0.6  |      |
| 211 | 74 | M | Colon                                                  | 11/05/2015 | 5 | 0 | Arm B | 4 | 0.1  | 1 | 1.9  | 1 | 14.7 | 09/07/2015 | 20/01/2017 | 20.6       | 1    | ETOPOSIDE + BEVACIZUMAB (VEGF antibody)                                         | MYC amplification equivalent<br>TP53 S206*24<br>APC C9955*10, L14885*19<br>BCL2L1 amplification-equival<br>SMAD4 R97H                                                                                                                                                                                                                                                                                                                                                                                                                                                                             | VEGFA (2.4 fold change) overexpression, ranked 4th in the single interaction                                                                                     |  | 0 | 0.25 |      |
| 212 | 55 | M | Lung                                                   | 08/05/2015 | 3 | 1 | Arm A | 4 | 1.5  | 1 | 1.11 | 1 | 0.7  |            | 11/06/2015 |            | 1.1  | 1                                                                               | EVEROLIMUS (mTOR inhibitor) + CARBOPLATIN                                                                                                                                                                                                                                                                                                                                                                                                                                                                                                                                                         | BRP1 E1914*<br>STK11 E165*<br>CCNE1 amplification<br>TP53 splice site 376-2A-T<br>SPTA1 Q17876*33                                                                |  |   | 1    | 0.4  |
| 216 | 50 | M | Head and Neck                                          | 06/05/2015 | 3 | 1 | Arm B | 4 | 3.3  | 1 | 0.75 | 1 | 0.2  | 29/05/2015 | 04/11/2015 | 6.1        | 1    | IPILIMUMAB                                                                      | PIK3CA C604R<br>PTEN Y107G<br>TET2 T2296*25<br>TP53 V147A<br>AR F814V<br>ARID1A G2766*87,<br>M15646*8<br>BCORL1 G16826*4<br>CDKN1B R316*44, N316*12<br>EPHA3 P239T<br>FAS T2196*4<br>MSH2 A2306*16<br>MSH6 F10885*2<br>MUTYH G382D<br>NOTCH1 V12296*2<br>SPEN T20466*2                                                                                                                                                                                                                                                                                                                            | CTLA4 (4.9 fold change) overexpression, ranked 3rd in the single interaction                                                                                     |  | 1 | 0.33 |      |
| 220 | 68 | M | Lung                                                   | 02/11/2015 | 1 | 0 | Arm A | 4 | 10.5 | 1 | 5.3  | 1 | 0.5  | 13/04/2016 | 02/07/2017 | 20.2       | 0    | NINTEDANIB (RET inhibitor)                                                      | RET NCOA4-RET fusion                                                                                                                                                                                                                                                                                                                                                                                                                                                                                                                                                                              |                                                                                                                                                                  |  | 1 | 1    |      |
| 223 | 65 | F | Head and Neck                                          | 22/09/2015 | 3 | 0 | Arm B | 3 | 6.7  | 1 | 7.1  | 1 | 1.1  | 26/04/2016 | 05/05/2017 | 19.7       | 0    | AXITINIB (multikinase inhibitor including PDGFR and IGF1R)                      | CCND1 T286I                                                                                                                                                                                                                                                                                                                                                                                                                                                                                                                                                                                       | PDGFRB (6.1 fold change) PDGFRB (5.5 fold change), KIT (5.2 fold change) overexpression, ranked 3rd in the multiple interaction                                  |  | 1 | 0.33 |      |
| 225 | 75 | F | Colon                                                  | 18/05/2015 | 2 | 1 | Arm A | 4 | 1.56 | 1 | 1.01 | 1 | 0.66 | 19/06/2015 | 04/08/2015 | 2.6        | 1    | PHASE 2 NCT01953926 NERATINIB (pan-ERBB inhibitor)                              | BRAF amplification equivalent<br>KRAS G13D<br>ERBB1 F355A<br>TP53 R342*<br>APC D16366*5<br>CDKN amplification<br>KEL amplification equivalent<br>MUTYH G382D<br>MYS17 amplification<br>SPTA1 R69*                                                                                                                                                                                                                                                                                                                                                                                                 |                                                                                                                                                                  |  | 0 | 0.1  |      |
| 226 | 76 | M | Liposarcoma                                            | 15/06/2015 | 3 | 2 | Arm A | 4 | 2.1  | 1 | 1.8  | 1 | 0.8  | 10/08/2015 | 03/06/2016 | 11.8       | 1    | CERITINIB (multikinase inhibitor, targets include IGF1R)                        | AKT1 amplification<br>CDK4 amplification<br>IGF1R amplification<br>MDM2 amplification<br>ESR1 amplification                                                                                                                                                                                                                                                                                                                                                                                                                                                                                       |                                                                                                                                                                  |  | 0 | 0.2  |      |
| 227 | 56 | M | Liposarcoma                                            | 26/06/2015 | 4 | 1 | Arm A | 4 | 1.7  | 1 | 1.7  | 1 | 0.9  | 17/08/2015 |            | 18/01/2017 | 19.1 | 0                                                                               | EVEROLIMUS                                                                                                                                                                                                                                                                                                                                                                                                                                                                                                                                                                                        | MTOR V2060F-SUBCLONAL<br>STK11 F354L<br>TERT promoter-124C>T                                                                                                     |  |   | 1    | 0.66 |
| 228 | 38 | M | Colon                                                  | 22/06/2015 | 5 | 1 | Arm A | 4 | 0.9  | 1 | 0.7  | 1 | 0.8  | 14/07/2015 | 22/08/2015 | 2.0        | 1    | PHASE 1 NCT02052778 TAS-120 (FGFR inhibitor)                                    | FGFR1 amplification equivalent<br>TP53 C176F<br>APC C1322*, R213*<br>SMAD4 loss<br>SOX9 V1636*21                                                                                                                                                                                                                                                                                                                                                                                                                                                                                                  |                                                                                                                                                                  |  | 0 | 0.2  |      |
| 229 | 31 | M | Colon                                                  | 14/05/2015 | 3 | 1 | Arm A | 4 | 2.3  | 1 | 2.0  | 1 | 0.8  | 14/07/2015 | 30/08/2015 | 3.6        | 1    | TRAMETINIB (MEK inhibitor) + CARBOPLATIN                                        | KRAS G12V<br>BRCA2 E333*3<br>BRP1 T11526*15<br>ATM E170P<br>EZH2 P570<br>FANCA splice site 1901-2A-G<br>FBXW7 V610*23<br>GRIK3 A757I subclonal<br>PARK3 V306*17<br>SMARCB1 T1186*52<br>NFE1A205*21<br>TP53 R273S subclonal, Y220C subclonal<br>APC C2010*9, V21946*3<br>ARID1A G370*14<br>ARID2 E376*<br>ATRX R1603*29<br>BCOR E159H<br>CHIR1 V756*18<br>CHKB2 V270*4<br>CIC1 P5967*4, S32*4, S8613*190<br>CHEBP1 K1270*4, P19466*30<br>CIC1 E2042*26<br>DNF1A P2916*51<br>KDM5C A15096*54<br>KLF14A20*42<br>LRF19 D2878*2, SPLICE SITE 602A>G<br>MLL3 K3793*26<br>MSH6 T0803*3<br>NOTCH1 A1025*8 |                                                                                                                                                                  |  | 0 | 0.18 |      |

|     |    |   |                             |            |   |   |       |   |      |   |      |   |      |            |            |  |      |      |                                                                                                                          |                                                                                                                                                                                                                                                                                                |                                                                                                                                                                                        |                                                                                                                                                                |      |      |   |
|-----|----|---|-----------------------------|------------|---|---|-------|---|------|---|------|---|------|------------|------------|--|------|------|--------------------------------------------------------------------------------------------------------------------------|------------------------------------------------------------------------------------------------------------------------------------------------------------------------------------------------------------------------------------------------------------------------------------------------|----------------------------------------------------------------------------------------------------------------------------------------------------------------------------------------|----------------------------------------------------------------------------------------------------------------------------------------------------------------|------|------|---|
| 232 | 51 | M | Colon                       | 17/02/2016 | 6 | 0 | Arm B | 4 | 8.8  | 1 | 1.6  | 1 | 0.2  | 05/04/2016 | 09/10/2016 |  | 7.8  | 1    | PEMETREXED + BEVACIZUMAB (VEGF antibody)                                                                                 | TP53 R175H APC K679*, T12956*8                                                                                                                                                                                                                                                                 | VEGFA (2.68 fold change) overexpression, ranked 1st in the single interaction                                                                                                          |                                                                                                                                                                | 1    | 1    |   |
| 233 | 56 | M | Head and Neck               | 05/06/2015 | 3 | 0 | Arm A | 4 | 1.9  | 1 | 1.8  | 1 | 0.9  | 29/07/2015 | 06/09/2015 |  | 3.1  | 1    | PHASE 2 NCT01737450 BKM120 ( PI3CA inhibitor)                                                                            | PIK3CA E545K BAP1 R385* EP300 D1399N                                                                                                                                                                                                                                                           |                                                                                                                                                                                        | 0                                                                                                                                                              | 0    |      |   |
| 235 | 60 | F | Lung                        | 16/07/2015 | 1 | 0 | Arm A | 3 | 7.0  | 1 | 11.3 | 1 | 1.6  | 26/06/2016 | 05/06/2017 |  | 23   | 0    | AFATINIB (pan-ERBB inhibitor)                                                                                            | ERBB2 A775, C776mVYMA                                                                                                                                                                                                                                                                          |                                                                                                                                                                                        | 1                                                                                                                                                              | 1    |      |   |
| 236 | 58 | M | Other: Neuroendocrine       | 13/07/2015 | 3 | 0 | Arm B | 4 | 18.9 | 1 | 2.3  | 1 | 0.1  |            | 22/09/2015 |  |      | 2.3  | 1                                                                                                                        | EVEROLIMUS (Akt inhibitor) + BUCALUTAMIDE + GOSERELIN (hormone modulators)                                                                                                                                                                                                                     | No mutation                                                                                                                                                                            | AKT3 (5.8 fold change), AKT3 (6.8 fold change), overexpression, each ranked 3rd in single interaction and ESR1 (1.8 fold change) ranked 1st single interaction |      | 1    | 1 |
| 237 | 47 | M | Head and Neck               | 18/11/2015 | 6 | 1 | Arm A | 3 | 3.9  | 1 | 19.3 | 0 | 4.8  |            | 28/06/2017 |  |      | 19.6 | 0                                                                                                                        | PHASE 1 NCT01004224 BGI398 (FGFR inhibitor)                                                                                                                                                                                                                                                    | CCND1 amplification FGF12 amplification equivocal CDKN2A/B loss FGF19 amplification FGF4 amplification BAP1 truncation exon 3 FGF3 amplification MAG2 Q1077* PBRM1 E11556*17           |                                                                                                                                                                | 1    | 0.44 |   |
| 238 | 68 | F | Colon                       | 02/10/2015 | 5 | 1 | Arm A | 4 | 5.7  | 1 | 3.5  | 1 | 0.6  | 16/01/2016 | 22/03/2016 |  | 5.7  | 1    | BEVACIZUMAB (VEGF antibody) + EVEROLIMUS (mTOR inhibitor)                                                                | TP53 G26V TSC2 loss exons 2-4 APC E13095*4                                                                                                                                                                                                                                                     |                                                                                                                                                                                        | 1                                                                                                                                                              | 0.66 |      |   |
| 240 | 78 | F | Lung                        | 19/08/2015 | 2 | 2 | Arm A | 4 | 20.5 | 1 | 4.0  | 1 | 0.2  | 20/12/2015 | 12/02/2016 |  | 5.9  | 1    | NINTEDANIB (RET and VEGFR inhibitor)                                                                                     | RET Ref 5b-ret fusion CDKN2A/B loss TP53 loss exon 10-11 BCL2L1 amplifications RPTOR amplification                                                                                                                                                                                             |                                                                                                                                                                                        | 1                                                                                                                                                              | 0.4  |      |   |
| 241 | 59 | M | Lung                        | 14/03/2016 | 5 | 1 | Arm A | 4 | 3.2  | 1 | 4    | 1 | 1.23 | 15/07/2016 | 15/07/2016 |  | 4.1  | 1    | EVEROLIMUS (PI3K/Akt/mTOR pathway inhibitor) + CRIZOTINIB                                                                | NR2F1 (R677*) GRIK2A (A302T)                                                                                                                                                                                                                                                                   |                                                                                                                                                                                        | 1                                                                                                                                                              | 0.5  |      |   |
| 242 | 78 | M | Other: Soft Tissue          | 29/10/2015 | 1 | 2 | Arm A | 4 | 6.2  | 1 | 1.2  | 1 | 0.2  | 06/12/2015 | 08/12/2015 |  | 1.3  | 1    | PALBOCICLIB (CDK4/6 inhibitor) + ETOPOSIDE                                                                               | cdk4 amplification MDM2 amplification                                                                                                                                                                                                                                                          |                                                                                                                                                                                        | 1                                                                                                                                                              | 0.5  |      |   |
| 246 | 51 | F | Colon                       | 07/12/2015 | 3 | 1 | Arm A | 2 | 3.3  | 1 | 6.2  | 1 | 1.8  | 09/06/2016 | 15/03/2017 |  | 15.4 | 1    | TRASTUZUMAB + PERITUZUMAB (ERBB2 inhibitor) + FACITAXEL (paclitaxel was added after start in supplement by investigator) | KRAS Q61L ERBB2 amplification FGFR1 amplification ARID1A Y2031* TOP2A amplification TP53 G266E TSC2 truncation intron 27 APC Q1429*, R876* MUTYH G382D MYST3 amplification PIK3CG V759I                                                                                                        |                                                                                                                                                                                        | 0                                                                                                                                                              | 0.09 |      |   |
| 247 | 67 | M | Other: GI Tract / Esophagus | 29/07/2015 | 2 | 1 | Arm A | 4 | 2.20 | 1 | 1.6  | 1 | 0.7  | 18/09/2015 | 16/11/2015 |  | 3.6  | 1    | PHASE 1 NCT02027778 TAS-120 (FGFR inhibitor)                                                                             | FGFR2 amplification - equivocal CDKN2A/B loss TP53 W91* ASXL1 splice site 472-2A>G                                                                                                                                                                                                             |                                                                                                                                                                                        | 1                                                                                                                                                              | 0.25 |      |   |
| 248 | 69 | M | Colon                       | 10/08/2015 | 2 | 2 | Arm A | 4 | 19.5 | 1 | 1.62 | 1 | 0.1  | 30/09/2015 | 16/11/2015 |  | 3.2  | 1    | TRAMETINIB (MEK inhibitor) + EVEROLIMUS (PI3K/Akt/mTOR pathway inhibitor)                                                | KRAS (G13D) PTEN (A79T)                                                                                                                                                                                                                                                                        |                                                                                                                                                                                        | 1                                                                                                                                                              | 1    |      |   |
| 249 | 41 | M | Colon                       | 28/07/2015 | 3 | 2 | Arm A | 4 | 3.8  | 1 | 0.7  | 1 | 0.12 | 18/08/2015 | 21/09/2015 |  | 1.8  | 1    | TRAMETINIB (MEK inhibitor) + SULINDAC (Wnt pathway inhibitor) + NILUTAMIDE                                               | KRAS (G12V) APC (E1554*) RUNX1T1 (R395W) SMAD4 (loss)                                                                                                                                                                                                                                          |                                                                                                                                                                                        | 1                                                                                                                                                              | 0.5  |      |   |
| 251 | 61 | F | Colon                       | 16/10/2015 | 3 | 1 | Arm A | 4 | 29.6 | 1 | 1.9  | 1 | 0.1  | 13/12/2015 | 06/01/2016 |  | 2.7  | 1    | PHASE 1 NCT02457551 Roncicicb (BAY 1000394) (CDK inhibitor)                                                              | KRAS (G12V) MYC amplification - equivocal TP53 (V1226*26)                                                                                                                                                                                                                                      |                                                                                                                                                                                        | 0                                                                                                                                                              | 0    |      |   |
| 256 | 45 | M | Head and Neck               | 27/08/2015 | 1 | 0 | Arm A | 4 | 8.2  | 1 | 4.5  | 1 | 0.5  | 13/01/2016 | 29/06/2017 |  | 22.4 | 0    | PHASE 1 NCT01884285 AZD8186 (PI3K, BETA inhibitor)                                                                       | PTEN splice site 635-1G>C, splice site 801-1G>A TERT promoter -124C>T                                                                                                                                                                                                                          |                                                                                                                                                                                        | 1                                                                                                                                                              | 0.5  |      |   |
| 257 | 67 | F | Colon                       | 09/09/2015 | 5 | 1 | Arm B | 4 | 2.9  | 1 | 2.1  | 1 | 0.7  | 11/11/2015 | 11/11/2015 |  | 2.1  | 0    | BEVACIZUMAB (VEGF antibody) + TRASTUZUMAB                                                                                | KRAS G12V ERBB2 R678Q IRS2 amplification TP53 C79G, splice site 919+1G>T APC K1437*, R283* FGF14 amplification                                                                                                                                                                                 | VEGFA (5.7 fold change) overexpression, ranked 1st in the single interaction                                                                                                           | 1                                                                                                                                                              | 1    |      |   |
| 258 | 58 | M | Head and Neck               | 01/03/2016 | 4 | 1 | Arm B | 4 | 7.0  | 1 | 0.2  | 1 | 0.1  | 08/03/2016 | 17/04/2016 |  | 1.5  | 1    | SUNITINIB (multikinase PEGFR and VEGFR inhibitor)                                                                        | TP53 R205*                                                                                                                                                                                                                                                                                     | FLT1/VEGFR1 (1.4 fold change), PDGFRB (1.4 fold change) overexpression, ranked 3rd in multiple interaction;                                                                            | 1                                                                                                                                                              | 0.33 |      |   |
| 259 | 53 | F | Head and Neck               | 06/01/2016 | 4 | 1 | Arm B | 3 | 10.9 | 1 | 6.2  | 1 | 0.5  | 12/07/2016 | 21/03/2017 |  | 14.6 | 0    | AXITINIB (multikinase inhibitor including PDGFR and KIT)                                                                 | PDGFR                                                                                                                                                                                                                                                                                          | PDGFR (52.8 fold change), PDGFA (16.9 fold change), VEGFA (11.9 fold change), PDGFR (3.4 fold change) and KIT (3.6 fold change) overexpression, ranked 2nd in the multiple interaction | 1                                                                                                                                                              | 0.5  |      |   |
| 263 | 29 | F | Head and Neck               | 21/09/2015 | 2 | 0 | Arm B | 3 | 5.1  | 1 | 20.9 | 0 | 4.01 |            | 18/06/2017 |  |      | 21.2 | 0                                                                                                                        | PHASE 1 NCT0264418 ODM203 (VEGFR/FGFR inhibitor)                                                                                                                                                                                                                                               | No mutation                                                                                                                                                                            | FLT4/VEGFR1 (1.2 fold change) VEGFA (2.3 fold change) and FGFR1 (4.4 fold change) overexpression; ranked 1st and 2nd in the single interaction                 | 1    | 1    |   |
| 267 | 39 | M | Melanoma                    | 09/09/2015 | 4 | 1 | Arm B | 4 | 4.6  | 1 | 2.8  | 1 | 0.6  |            | 03/12/2015 |  |      | 2.83 | 1                                                                                                                        | PHASE 1 NCT02912949 MCLA-128 (HER3 inhibitor)                                                                                                                                                                                                                                                  | CDKN2A/B loss ARID1 E186* TERT promoter -146C>T                                                                                                                                        | ERBB3 (1.7 fold change) overexpression, ranked 5th in the single interaction                                                                                   | 0    | 0.2  |   |
| 268 | 51 | F | Melanoma                    | 18/11/2015 | 5 | 1 | Arm A | 4 | 1.8  | 1 | 3.9  | 1 | 2.2  | 18/03/2016 | 11/05/2017 |  | 18   | 1    | EVEROLIMUS (PI3K/Akt/mTOR inhibitor) + ETOPOSIDE                                                                         | FGFR1 splice site 445-3delTAGG P19V 95E MYC amplification                                                                                                                                                                                                                                      |                                                                                                                                                                                        | 1                                                                                                                                                              | 0.33 |      |   |
| 270 | 76 | F | Colon                       | 02/12/2015 | 3 | 1 | Arm A | 4 | 0.6  | 1 | 0.9  | 1 | 1.5  | 30/12/2015 | 03/04/2016 |  | 4.1  | 1    | PHASE 1b NCT0250673 CERGUTUZUMAB (CEA-targeted IL-2 variant-based immunotoxin) + AZELOSUZUMAB (anti PDL1/PDL1)           | FLT4 amplification CDKN2A/B loss CDKN2A/B loss CDKN2A/B loss BARD1 C536*5 MYC amplification PARC2 loss exons 3-5 TP53 R175H APC T15566*3 BCL2L1 amplification CDK8 amplification ETV6 rearrangement intron 5 FAM123B R497* GATM6 amplification equivocal KDM6A Y215* MUTYH Y165C NOTCH1 Q2123* |                                                                                                                                                                                        | 1                                                                                                                                                              | 1    |      |   |
| 282 | 55 | M | Head and Neck               | 12/08/2016 | 3 | 0 | Arm A | 4 | 3.5  | 1 | 1.5  | 1 | 0.4  | 28/09/2016 | 29/06/2017 |  | 10.7 | 0    | PALBOCICLIB (CDK4/6 inhibitor) + CETUXIMAB                                                                               | CCND1 amplification CDKN2A loss p16INK4a and loss p14ARF exons 2-3 FGF19 amplification FGF4 amplification TP53 R248L FGF3 amplification SMARCA4 G1266*3 SPTA1 R48W TERT promoter -146C>T                                                                                                       |                                                                                                                                                                                        | 0                                                                                                                                                              | 0.22 |      |   |
| 285 | 66 | F | Lung                        | 25/03/2016 | 5 | 1 | Arm A | 4 | 4.1  | 1 | 2.7  | 1 | 0.6  | 17/06/2016 | 18/04/2017 |  | 12.9 | 0    | PHASE 1 NCT02014116 LY3009120 (pan-RAF inhibitor)                                                                        | BRAF D594N PIK3CA E39K PIK3RI (Q572R)30 PTEN V178L ARID1A R128768 MYC amplification MUTYH Y165C                                                                                                                                                                                                |                                                                                                                                                                                        | 0                                                                                                                                                              | 0.14 |      |   |
| 286 | 52 | M | Colon                       | 11/01/2016 | 3 | 0 | Arm A | 2 | 7.8  | 1 | 10.4 | 1 | 1.3  | 22/11/2016 | 31/05/2017 |  | 16.8 | 1    | PHASE 1 NCT01759018 PANTUMUMAB + TRAMETINIB (MEK inhibitor)                                                              | KRAS Q61H TP53 E271K TBX3 W113*                                                                                                                                                                                                                                                                |                                                                                                                                                                                        | 1                                                                                                                                                              | 0.33 |      |   |
| 288 | 66 | F | Colon                       | 06/04/2016 | 4 | 1 | Arm B | 3 | 4.2  | 1 | 6.8  | 1 | 1.6  | 31/10/2016 | 13/02/2017 |  | 10.4 | 1    | CABIZANTINIB (VEGFR/MET inhibitors)                                                                                      | KRAS G13C TP53 R196* APC E1451* DNMT3A Y735C subclonal                                                                                                                                                                                                                                         | MET (7.2 fold change) and VEGFA (3.7 fold change) overexpression, ranked 1st and 2nd in the single interaction                                                                         | 1                                                                                                                                                              | 1    |      |   |



|     |    |   |                  |            |   |   |       |   |      |   |     |   |      |            |            |  |      |   |                                                                                        |                                                                                                                                                                                                                                                            |                                                                                                                                                                                       |   |      |
|-----|----|---|------------------|------------|---|---|-------|---|------|---|-----|---|------|------------|------------|--|------|---|----------------------------------------------------------------------------------------|------------------------------------------------------------------------------------------------------------------------------------------------------------------------------------------------------------------------------------------------------------|---------------------------------------------------------------------------------------------------------------------------------------------------------------------------------------|---|------|
| 292 | 76 | M | Head and Neck    | 20/01/2016 | 2 | 2 | Arm A | 4 | 2.9  | 1 | 0.7 | 1 | 0.2  | 11/02/2016 | 18/03/2016 |  | 1.93 | 1 | PAZOPANIB (FLT1 (VEGFR1) inhibitor)                                                    | FLT1 G40E<br>HRAS G13D<br>BARD1 W93*<br>CDKN2A p16INK4a R80* and p14ARF P94L<br>ARID3B E1237E*1, R542*<br>ASXL1 D10306*4<br>FAT1 G759*, P16466*3<br>NOTCH1 W 1474*<br>NOTCH2 Q807*<br>RANBP2 L811R, subclonal<br>TERT promoter -146C>T<br>TP53 Q75*, R213* |                                                                                                                                                                                       | 0 | 0.16 |
| 294 | 57 | M | Head and Neck    | 03/10/2016 | 1 | 1 | Arm B | 4 | 19.0 | 1 | 1.7 | 1 | 0.1  | 24/11/2016 | 20/05/2017 |  | 7.6  | 1 | NIVOLUMAB                                                                              | BRCA2 K3408*                                                                                                                                                                                                                                               | IL2RA (2.7 fold change), IL2RB (2.6 fold change), IL2RG (3.6 fold change) and CD52 (4.5 fold change) overexpression; reflects T-cell infiltrate; ranked 1st in the single interaction | 1 | 1    |
| 295 | 61 | F | Rhabdomyosarcoma | 14/05/2016 | 1 | 0 | Arm B | 3 | 21.9 | 1 | 9.2 | 1 | 0.4  | 17/02/2017 | 20/06/2017 |  | 13.4 | 0 | CERITINIB (multikinase inhibitor; targets include IGF1R)                               | PIK3CA E542Q                                                                                                                                                                                                                                               | IGF1R (5.3 fold change) overexpression; ranked 2nd in the single interaction report                                                                                                   | 1 | 0.5  |
| 296 | 63 | M | Colon            | 15/02/2016 | 6 | 0 | Arm B | 4 | 1.1  | 1 | 3.3 | 1 | 2.97 | 26/05/2016 | 24/09/2016 |  | 7.4  | 1 | CABOZANTINIB (VEGFR/MET inhibitor)                                                     | KRAS Q61H<br>APC S1346*<br>EP300 truncation exon 27<br>NOTCH2 A4396*4<br>SMAD1 loss<br>TP53 R196*                                                                                                                                                          | MET (5.2 fold change) and VEGFA (4.1 fold change) overexpression; ranked 1st and 2nd in the single interaction                                                                        | 1 | 1    |
| 297 | 67 | M | Hepatocarcinoma  | 08/11/2016 | 2 | 0 | Arm B | 2 | 9.23 | 1 | 7.6 | 0 | 0.8  |            | 27/06/2017 |  | 7.7  | 0 | PHASE 1 NCT01968109 NIVOLUMAB + ANTI-LAG3                                              | PIK3CA K111E<br>CTNNB1 N387K<br>TERT promoter -124C>T                                                                                                                                                                                                      | IL2RA (5.2 fold change), IL2RB (1.4 fold change) and CD52 (1.9 fold change) overexpression; reflects T-cell infiltrate; T cell targeting ranked 3rd in single interaction             | 1 | 0.33 |
| 298 | 59 | M | Colon            | 23/05/2016 | 5 | 1 | Arm A | 4 | 2.3  | 1 | 1.7 | 1 | 0.7  | 15/07/2016 | 02/10/2016 |  | 4.4  | 1 | PHASE 1b NCT02327169 MLN2480 (pan-RAF inhibitor) + alisertib (AURORA KINASE inhibitor) | NRAS Q61R<br>AURKA amplification<br>equivocal<br>HGF P700T<br>TP53 R175H                                                                                                                                                                                   |                                                                                                                                                                                       | 1 | 0.5  |
| 299 | 44 | F | Colon            | 20/06/2016 | 5 | 0 | Arm A | 4 | 4.8  | 1 | 1.0 | 1 | 0.2  | 20/07/2016 | 15/06/2017 |  | 12   | 0 | SORAFENIB (multikinase inhibitor including FLT3 and VEGFR)                             | FLT3 amplification equivocal<br>IRS2 amplification equivocal<br>APC S11006*26<br>CD68 amplification equivocal<br>FAT1 loss; exon 2-24<br>LRP1B G1055R<br>TP53 R175H                                                                                        |                                                                                                                                                                                       | 1 | 0.28 |
| 301 | 69 | M | Colon            | 29/06/2016 | 4 | 0 | Arm A | 3 | 2.4  | 1 | 6.0 | 1 | 2.5  | 30/12/2016 | 02/03/2017 |  | 8.2  | 0 | LENVATINIB (FGFR inhibitor)                                                            | NRAS G12D<br>KRAS G12D<br>FGFR2 K659E<br>PKR31 splice site<br>1162_1299+1744d312<br>APC E984* R1450*<br>CTD2 truncation; exon 24<br>PPP2R1A R183W                                                                                                          |                                                                                                                                                                                       | 0 | 0.14 |

\*DNA - Molecular alterations: list of all molecular alterations given in the Foundation Medicine report.

\*\*RNA - Relevant transcripts tumor versus normal that led to drug choice. Winther algorithm uses the Log in base 2 of the ratio of Tumor/Normal intensities ratio. For ease reading and interpretation, we present expression as fold change between expression in Tumors vs Normal matched tissue. Data is presented per interpretation at time of initial scoring.

\*\*\*The selection of the drugs given was based on factors such as drug/clinical trial availability in the country/institute and patient co-morbidities; neither the selection of drugs or the scoring was locked down but was based on knowledge at the time. Drug selection was recommended by the CMC, but physicians could choose the drugs given; scoring was done post hoc, but by investigators and statistician blinded at the time to outcome; drugs in regimen that were unmatched were scored as zero.

\*\*\*\*Scores over 1 were rounded to 1 herein; unmatched drugs were scored as zero; retrospectively, it was apparent that sometimes drugs matched both Arms A and B, in which case scoring was performed on the basis of the Arm that was considered matched at the time of the CMC teleconference; for multiple interaction scoring, the reciprocal of the rank for each drug constituted the score; for single interactions, the reciprocal of the rank of each distinct target impacted constituted the score (when targets were similar, eg ligand and receptor, they were scored as one).

#### Abbreviations and Definitions

|                                                                                                                                                                                                                     |                                                                                                                                                                                                                                                                                   |
|---------------------------------------------------------------------------------------------------------------------------------------------------------------------------------------------------------------------|-----------------------------------------------------------------------------------------------------------------------------------------------------------------------------------------------------------------------------------------------------------------------------------|
| <b>Date_Death:</b> Date of death                                                                                                                                                                                    | <b>OS:</b> Overall survival in month                                                                                                                                                                                                                                              |
| <b>Date_Last_Known_Alive:</b> Date of last known alive                                                                                                                                                              | <b>PFS:</b> Progression free survival in month                                                                                                                                                                                                                                    |
| <b>Date_Progression_under_WINTHER_treatment:</b> Date of progression                                                                                                                                                | <b>PFS_ratio:</b> Time of PFS2/ time of PFS1                                                                                                                                                                                                                                      |
| <b>DNA_matching_score_high:</b> DNA matching score; 0=low, 1=high<br>The Matching Score derived from the number of alterations matched to drug(s) received divided by the total number of alterations for any given | <b>Response:</b> Overall response of WINTHER treatment:<br>1=Complete response, 2=partial response; 3=stable disease for at least 6 months; 4=stable disease for less than 6 months or progressive disease                                                                        |
| <b>Drug_given:</b> Drug(s) given in the WINTHER treatment                                                                                                                                                           | <b>RNA_matching_score_high:</b> RNA matching score; 0=low, 1=high<br>The Matching Score was assigned by adding the reciprocal of the ranks of each matched drug received by the patient based on the WINTHER algorithm (or simply the reciprocal of the rank if only one drug was |
| <b>Event_OS:</b> Censoring indicator of overall survival: 0=censored, 1=event                                                                                                                                       | <b>Single_interaction:</b> Drug with 1 known target gene                                                                                                                                                                                                                          |
| <b>Event_PFS1:</b> Censoring indicator of PFS1: 0=censored, 1=event                                                                                                                                                 | <b>Time_OS:</b> Time of overall survival in month                                                                                                                                                                                                                                 |
| <b>Event_PFS2:</b> Censoring indicator of PFS2: 0=censored, 1=event                                                                                                                                                 | <b>Time_PFS1:</b> Time of PFS1 (before WINTHER) in month                                                                                                                                                                                                                          |
| <b>One_or_Zero:</b> One being high score; zero being low matching score                                                                                                                                             | <b>Time_PFS2:</b> Time of PFS2 (WINTHER trial) in month                                                                                                                                                                                                                           |
| <b>Multiple_interaction:</b> Drug for which more than 1 gene was involved                                                                                                                                           | <b>Zero_or_one:</b> Zero being low matching score; one being high score                                                                                                                                                                                                           |

#### Supplemental explanations and references for Supplemental Table 4

Below are references and considerations used for degree of matching evaluation (see also **Methods** and footnotes for **Supplemental Table 4**). Explanations are given for patients with complexity in scoring. For all patients, pertinent targets are given in brackets beside the drug name (**Supplemental Table 4**).

**Patient ID6, ID69, ID90, ID117, ID233:** Patients with multiple ( $\geq 2$ ) alterations (and especially those with MEK pathway alterations) in addition to a PI3K/Akt/mTOR alterations matched to a PI3K/Akt/mTOR inhibitor as a single agent have low response rates and were considered unmatched; mTOR inhibitors as part of a matched combination in this situation, however, have been reported to have higher response rates and were considered matched (14, 32, 36 and supplemental reference S1). mTOR inhibitors as single agents matched by transcriptomics were considered matched.

**Patient ID1, ID10, ID99, ID124, ID140, ID179, ID191, ID200, ID238, ID240, ID288:** VEGFR/VEGF inhibitors were considered matched for *TP53* alterations. (Supplemental references S2, S3 and S4).

**Patient ID87:** *ATR* and *BRCA* alterations can be targeted by PARP inhibitors and platinum (Supplemental references S5, S6, S7 and S8).

**Patient ID103:** PTPN11 activates the MEK pathway (<https://ghr.nlm.nih.gov/gene/PTPN11>). APC activates Wnt/ $\beta$ -catenin signaling, which is inhibited by Sulindac (Supplemental reference S9).

**Patient ID146:** Dasatinib regulates many of the genes listed [https://www.researchgate.net/publication/293865698\\_Additional\\_file\\_3\\_and\\_supplemental\\_reference\\_S10](https://www.researchgate.net/publication/293865698_Additional_file_3_and_supplemental_reference_S10).

**Patient ID103, ID137, ID140, ID179, ID249:** APC activates Wnt/ $\beta$ -catenin signaling, which is inhibited by Sulindac (Supplemental reference S9) and regorafenib (Supplemental reference S11).

**Patient ID164:** RNF43 regulates the WNT pathway (Supplemental reference S9).

**Patient ID191, ID241:** NF2 can activate the mTOR pathway (Supplemental reference S12).

**Patient ID201:** AREG binds EGFR; EREG interacts with EGFR and ERBB4, both of which heterodimerize with ERBB2. The impact of an ERBB2/ERBB2 targeting antibody was hence unclear and was given half of the normal score (since relevant receptors formed a heterodimer). [https://www.researchgate.net/figure/Binding-specificity-of-EGF-transforming-growth-factor-a-TGF-a-amphiregulin-AREG\\_fig1\\_283083537](https://www.researchgate.net/figure/Binding-specificity-of-EGF-transforming-growth-factor-a-TGF-a-amphiregulin-AREG_fig1_283083537)

**Patient ID205, ID210, ID249:** *SMAD4* alterations (as well as *KRAS* and *BRAF* alterations) activate the MEK pathway (Supplemental reference S13).

**Patient ID210:** EGFR inhibitors synergize with MEK/BRAF inhibitors in treating BRAF positive disease (Supplemental reference S14).

**Patient ID212:** STK11 activates mTOR pathway (Supplemental reference S15). BRP1 is BRCA1 interacting protein. BRCA1 alterations confer sensitivity to platinum and PARP inhibitors.

**Patient ID220, ID240:** Nintedanib is a multikinase inhibitor and RET and VEGFR are targets (supplemental reference S16).

**Patient ID226, ID295:** Ceritinib is a multikinase inhibitor whose targets at clinically relevant concentrations include IGF1R (FDA package insert: [https://www.accessdata.fda.gov/drugsatfda\\_docs/label/2017/205755s009lbl.pdf](https://www.accessdata.fda.gov/drugsatfda_docs/label/2017/205755s009lbl.pdf))

#### References for Supplemental Table 4

**S1.** Janku, F. et al. *PIK3CA*, and PTEN Aberrations in Early-Phase Trials with PI3K/AKT/mTOR Inhibitors: Experience with 1,656 Patients at MD Anderson Cancer Center. *Cell Rep* . **6**, 377–387 (2014).

**S2.** Wheeler, J.J. et al. TP53 Alterations Correlate with Response to VEGF/VEGFR inhibitors: Implications for Targeted Therapeutics. *Mol Cancer Ther* . **15**, 2475–2485 (2016).

**S3.** Koehler, K., Liebner, D., & Chen, J.L. TP53 mutational status is predictive of pazopanib response in advanced sarcomas. *Ann. Oncol* . **27**, 539–543 (2016).

**S4.** Schwaederle, M. et al. VEGF-A Expression Correlates with TP53 Mutations in Non-Small Cell Lung Cancer: Implications for Antiangiogenesis Therapy. *Cancer Res* . **75**, 1187–1190 (2015).

**S5.** Kawahara, N. et al. Candidate synthetic lethality partners to PARP inhibitors in the treatment of ovarian clear cell cancer. *Biomed Rep* . **7**, 391–399 (2017).

**S6.** Choi, M., Kipps, T., & Kurzrock, R. ATM Mutations in Cancer: Therapeutic Implications. *Mol Cancer Ther* . **15**, 1781–1791 (2016).

**S7.** Weber, A.M., Ryan, A.J. ATM and ATR as therapeutic targets in cancer. *Pharmacol. Ther* . **149**, 124–138 (2015).

**S8.** Cliby, W.A. et al Overexpression of a kinase-inactive ATR protein causes sensitivity to DNA-damaging agents and defects in cell cycle checkpoints. *EMBO J* . **17**, 159–169 (1998).

**S9.** Krishnamurthy, N., & Kurzrock, R. Targeting the Wnt/beta-catenin pathway in cancer: Update on effectors and inhibitors. *Cancer Treat. Rev* . **62**, 50–60 (2018).

**S10.** Le XF et al. The role of p27(Kip1) in dasatinib-enhanced paclitaxel cytotoxicity in human ovarian cancer cells. *J Natl Cancer Inst* **103** (18), 1403–22 (2011)

**S11.** Lin, X.L. et al. Regorafenib inhibited gastric cancer cells growth and invasion via CXCR4 activated Wnt pathway. *PLoS One* . **12**, e0177335 (2017).

**S12.** Subbiah et al. Treatment of Patients With Advanced Neurofibromatosis Type 2 With Novel Molecularly Targeted Therapies: From Bench to Bedside. *J Clin Oncol* . **30** (5), e64–e68 (2012)

**S13.** Ai X et al. Targeting the ERK pathway reduces liver metastasis of Smad4-inactivated colorectal cancer *Cancer Biol Ther* . **11**, 1059–67. (2013)

**S14.** Hong DS, et al. Phase IB Study of Vemurafenib in combination with Irinotecan and Cetuximab in Patients with Metastatic Colorectal Cancer with BRAFV600E Mutation. *Cancer Discov* . **12**, 1352–1365 (2016)

**S15.** Parachoniak CA et al. Exceptional durable response to everolimus in a patient with biphenotypic breast cancer harboring an STK11 variant. *Cold Spring Harb Mol Case Study* 3(5): a000778.doi: 10.1101/mcs.a000778 (2017).

**S16.** Awashi N et al. Profile of nintedanib in the treatment of solid tumors: the evidence to date. *Onco Targets Ther* . **8**, 3691–3701 (2015).
